# Supplementary material for: Nation-Wide Analysis of Glaucoma Medication Prescription in Fiscal Year of 2019 in Japan
Source: MDPI journal article supplement (doi:10.3390/jpm12060956), 2022-06-11
Supplement: s1 [file s1]

| CODE        | Drug name JPN            | Drug name ENG                                               | Class        | FDC |
|-------------|--------------------------|-------------------------------------------------------------|--------------|-----|
| 622,150,001 | アイファガン点眼液 0.1%           | AIPHAGAN OPHTHALMIC SOLUTION 0.1%                           | $\alpha 2$   | -   |
| 621,984,801 | コソプト配合点眼液                | COSOPT ophthalmic solution                                  | $\beta$ +CAI | 1   |
| 622,374,601 | グラナテック点眼液 0.4%           | GLANATEC ophthalmic solution 0.4%                           | ROCK         | -   |
| 622,418,901 | コソプトミニ配合点眼液 0.4 mL       | COSOPT Mini ophthalmic solution                             | $\beta$ +CAI | 1   |
| 620,224,801 | キサラタン点眼液 0.005%          | Xalatan Eye Drops 0.005%                                    | PG           | -   |
| 620,008,568 | タプロス点眼液 0.015%           | TAPROS ophthalmic solution                                  | PG           | -   |
| 620,005,257 | エイゾプト懸濁性点眼液 1%           | Azopt Ophthalmic Suspension 1%                              | CAI          | -   |
| 622,278,801 | アゾルガ配合懸濁性点眼液             | AZORGA Combination Ophthalmic Suspension                    | $\beta$ +CAI | 1   |
| 622,248,201 | タプロスミニ点眼液 0.015% 0.3 mL  | TAPROS Mini ophthalmic solution                             | PG           | -   |
| 660,432,003 | トルソプト点眼液 1%              | TRUSOPT ophthalmic solution 1%                              | CAI          | -   |
| 622,509,901 | ミケルナ配合点眼液                | Mikeluna combination ophthalmic solution                    | PG+ $\beta$  | 1   |
| 621,933,101 | ルミガン点眼液 0.03%            | LUMIGAN OPHTHALMIC SOLUTION 0.03%                           | PG           | -   |
| 620,004,892 | ミケランLA点眼液 2%             | Mikelan LA ophthalmic solution 2%                           | $\beta$      | -   |
| 620,005,833 | トラバタンズ点眼液 0.004%         | TRAVATANZ Ophthalmic Solution 0.004%                        | PG           | -   |
| 622,640,201 | ドルモロール配合点眼液「ニットー」        | Dormolol Combination Ophthalmic Solution 「NITTO」            | $\beta$ +CAI | 1   |
| 620,005,312 | レスキュラ点眼液 0.12%           | Rescula Eye Drops 0.12%                                     | Other        | -   |
| 660,451,004 | デタントール 0.01%点眼液          | Detantol ophthalmic solution                                | Other        | -   |
| 622,279,101 | タプコム配合点眼液                | TAPCOM combination ophthalmic solution                      | PG+ $\beta$  | 1   |
| 622,640,101 | ブリンゾラミド懸濁性点眼液 1%「ニットー」   | Brinzolamide Ophthalmic Suspension 1%「NITTO」                | CAI          | -   |
| 622,637,201 | ドルモロール配合点眼液「センジュ」        | DORMOLOL COMBINATION OPHTHALMIC SOLUTION「SENJYU」            | $\beta$ +CAI | 1   |
| 621,974,201 | ザラカム配合点眼液                | Xalacom Combination Eye Drops                               | PG+ $\beta$  | 1   |
| 621,985,001 | デュオトラバ配合点眼液              | DUOTRAV Combination Ophthalmic Solution                     | PG+ $\beta$  | 1   |
| 622,637,101 | ブリンゾラミド懸濁性点眼液 1%「センジュ」   | BRINZOLAMIDE OPHTHALMIC SUSPENSION 1%「SENJU」                | CAI          | -   |
| 621,990,401 | ラタノプロスト点眼液 0.005%「ニットー」  | Latanoprost Ophthalmic Solution 0.005%「NITTO」               | PG           | -   |
| 622,282,101 | カルテオロール塩酸塩LA点眼液 2%「わかもと」 | Carteolol Hydrochloride LA Ophthalmic Solution 2%「WAKAMOTO」 | $\beta$      | -   |
| 621,980,502 | ラタノプロスト点眼液 0.005%「SEC」   | Latanoprost ophthalmic solution「SEC」                        | PG           | -   |
| 620,003,860 | チモプトール点眼液 0.5%           | TIMOPTOL ophthalmic solution 0.5%                           | $\beta$      | -   |
| 622,640,001 | トラボプロスト点眼液 0.004%「ニットー」  | Travoprost Ophthalmic Solution 0.004%「NITTO」                | PG           | -   |
| 621,984,601 | ラタノプロスト点眼液 0.005%「センジュ」  | LATANOPROST OPHTHALMIC SOLUTION 0.005%「SENJYU」              | PG           | -   |
| 622,621,701 | ドルモロール配合点眼液「わかもと」        | LATANOPROST OPHTHALMIC SOLUTION 0.005%「WAKAMOTO」            | $\beta$ +CAI | 1   |
| 622,653,101 | エイベリス点眼液 0.02%           | EYBELIS ophthalmic solution                                 | EP2          | -   |
| 621,996,301 | ラタノプロストPF点眼液 0.005%「日点」  | Latanoprost PF Ophthalmic Solution 0.005%「NITTEN」           | PG           | -   |

| Generic | Man  |      |       |       |       |       |       |       |        |        |        |        |         |         |
|---------|------|------|-------|-------|-------|-------|-------|-------|--------|--------|--------|--------|---------|---------|
|         | 0-4  | 5-9  | 10-14 | 15-19 | 20-24 | 25-29 | 30-34 | 35-39 | 40-44  | 45-49  | 50-54  | 55-59  | 60-64   | 65-69   |
| -       | 0    | 3695 | 6030  | 9280  | 15900 | 25140 | 48150 | 96250 | 198975 | 368684 | 550607 | 781160 | 1050178 | 1576045 |
| -       | 2145 | 3700 | 6170  | 7150  | 8600  | 13615 | 23650 | 43150 | 82345  | 148370 | 211789 | 300135 | 399149  | 629538  |
| -       | 1980 | 4255 | 3700  | 5888  | 9010  | 13980 | 25195 | 49300 | 92805  | 162675 | 241495 | 338631 | 445380  | 676249  |
| -       | 0    | 0    | 448   | 1426  | 1890  | 4170  | 4812  | 11473 | 20613  | 43317  | 57323  | 87023  | 115414  | 183194  |
| -       | 0    | 2748 | 3863  | 3358  | 4015  | 6735  | 13908 | 28275 | 57418  | 99890  | 148955 | 209008 | 275045  | 419513  |
| -       | 0    | 0    | 1613  | 2870  | 3813  | 6613  | 14193 | 30803 | 69635  | 118014 | 170063 | 238298 | 308053  | 458490  |
| -       | 1220 | 3680 | 4305  | 3330  | 4020  | 7230  | 11420 | 21595 | 43185  | 85173  | 125500 | 177173 | 244890  | 404184  |
| -       | 1140 | 1760 | 2500  | 3625  | 5640  | 9110  | 17900 | 37060 | 75590  | 133355 | 196898 | 270025 | 363830  | 540907  |
| -       | 0    | 0    | 420   | 524   | 614   | 1228  | 2576  | 5348  | 10501  | 17028  | 23060  | 36080  | 49288   | 77869   |
| -       | 1415 | 2070 | 2900  | 2270  | 2300  | 3920  | 6925  | 13635 | 24535  | 48600  | 72995  | 104675 | 154745  | 256563  |
| -       | 0    | 0    | 0     | 1198  | 2595  | 5690  | 10960 | 21668 | 49130  | 84058  | 119168 | 162573 | 201226  | 284240  |
| -       | 0    | 0    | 0     | 1293  | 2515  | 3427  | 6720  | 12513 | 24110  | 48558  | 73258  | 104868 | 142630  | 219343  |
| -       | 0    | 0    | 1410  | 1948  | 2540  | 3533  | 6705  | 12605 | 27344  | 48014  | 63970  | 83969  | 101685  | 141283  |
| -       | 0    | 0    | 0     | 0     | 1120  | 2188  | 3733  | 8908  | 19918  | 35480  | 51958  | 73898  | 100171  | 156315  |
| 1       | 0    | 0    | 0     | 1775  | 3295  | 5215  | 9693  | 18125 | 36343  | 62420  | 88218  | 124078 | 166455  | 227068  |
| -       | 0    | 0    | 1335  | 2190  | 3790  | 4530  | 7910  | 11105 | 20755  | 33135  | 44893  | 58842  | 74190   | 120655  |
| -       | 0    | 0    | 0     | 0     | 0     | 1530  | 2990  | 4575  | 10650  | 18130  | 32920  | 47300  | 66127   | 106621  |
| -       | 0    | 0    | 0     | 0     | 1038  | 2283  | 4973  | 11268 | 24190  | 45312  | 65850  | 90955  | 111640  | 156275  |
| 1       | 0    | 0    | 0     | 1660  | 1645  | 2910  | 5255  | 10105 | 19405  | 37125  | 57785  | 78010  | 112425  | 168868  |
| 1       | 0    | 0    | 0     | 1205  | 1980  | 3420  | 6220  | 9835  | 23140  | 42010  | 58063  | 82556  | 119458  | 180898  |
| -       | 0    | 0    | 0     | 0     | 1090  | 2095  | 4130  | 9150  | 16985  | 36055  | 51178  | 73205  | 93400   | 138974  |
| -       | 0    | 0    | 0     | 0     | 1275  | 1770  | 3678  | 7910  | 17610  | 34258  | 51790  | 76902  | 93897   | 136382  |
| 1       | 0    | 0    | 1120  | 0     | 1250  | 1995  | 4145  | 7210  | 14865  | 27950  | 47428  | 72420  | 98800   | 150070  |
| 1       | 0    | 0    | 0     | 0     | 1250  | 2235  | 4663  | 9178  | 18265  | 30165  | 43035  | 56363  | 77475   | 111193  |
| 1       | 0    | 0    | 0     | 0     | 1786  | 3008  | 5785  | 11518 | 22198  | 35948  | 46698  | 61166  | 77638   | 101433  |
| 1       | 0    | 0    | 0     | 0     | 0     | 1683  | 3665  | 7473  | 16885  | 27538  | 41485  | 57861  | 76155   | 108543  |
| -       | 0    | 0    | 1213  | 1210  | 0     | 1905  | 2910  | 5590  | 11033  | 19013  | 25578  | 35170  | 49810   | 78060   |
| 1       | 0    | 0    | 0     | 0     | 0     | 1470  | 3278  | 6453  | 14595  | 24565  | 38193  | 52910  | 69940   | 97895   |
| 1       | 0    | 0    | 0     | 0     | 0     | 1400  | 2740  | 5938  | 13883  | 25279  | 34035  | 49183  | 64055   | 97328   |
| 1       | 0    | 0    | 0     | 0     | 1680  | 2280  | 4880  | 7520  | 16380  | 26890  | 43808  | 59140  | 78488   | 115310  |
| -       | 0    | 0    | 0     | 1428  | 2150  | 4503  | 8198  | 15508 | 30709  | 44965  | 53909  | 61342  | 64368   | 71184   |
| 1       | 0    | 0    | 0     | 0     | 0     | 1638  | 3058  | 5823  | 12721  | 20415  | 28031  | 37830  | 52241   | 75130   |

| 70-74   | 75-79   | 80-84   | 85-89   | 90-94  | 95-99 | 100- | Total    | Woman |      |       |       |       |       |       |
|---------|---------|---------|---------|--------|-------|------|----------|-------|------|-------|-------|-------|-------|-------|
|         |         |         |         |        |       |      |          | 0-4   | 5-9  | 10-14 | 15-19 | 20-24 | 25-29 | 30-34 |
| 2043438 | 2461637 | 2038906 | 1322587 | 487808 | 71307 | 3375 | 13159152 | 0     | 2155 | 5515  | 8935  | 12365 | 20405 | 38830 |
| 857364  | 1025981 | 840196  | 528954  | 195148 | 26876 | 1525 | 5355550  | 1020  | 2980 | 4663  | 7015  | 7870  | 10810 | 18708 |
| 863506  | 1031723 | 849532  | 538858  | 196855 | 28050 | 1720 | 5580787  | 1260  | 3340 | 4425  | 4810  | 6990  | 8465  | 15339 |
| 197831  | 244898  | 201840  | 106672  | 34275  | 3557  | 0    | 1320177  | 0     | 839  | 764   | 1442  | 995   | 3699  | 7294  |
| 587710  | 723972  | 608277  | 392622  | 149481 | 26800 | 1705 | 3763298  | 0     | 1923 | 2578  | 3415  | 3575  | 5310  | 10618 |
| 611962  | 717400  | 582770  | 356847  | 131560 | 20267 | 1855 | 3845119  | 0     | 0    | 0     | 1663  | 2739  | 5224  | 10765 |
| 586478  | 727528  | 636827  | 433799  | 166495 | 31190 | 2155 | 3721377  | 1180  | 3105 | 3540  | 3175  | 3135  | 4645  | 8235  |
| 650190  | 702926  | 518637  | 296350  | 99955  | 13910 | 0    | 3941308  | 0     | 1625 | 2830  | 3970  | 4880  | 7345  | 15740 |
| 94869   | 124275  | 101274  | 63555   | 23471  | 3309  | 359  | 635648   | 0     | 0    | 0     | 615   | 498   | 1191  | 2485  |
| 351168  | 442620  | 396440  | 271775  | 109335 | 20220 | 1405 | 2290511  | 0     | 0    | 1605  | 2030  | 2130  | 3465  | 6160  |
| 331723  | 355030  | 264763  | 146910  | 45984  | 5520  | 0    | 2092436  | 0     | 0    | 0     | 1410  | 1820  | 4168  | 9133  |
| 296998  | 368610  | 312056  | 211835  | 85598  | 14470 | 1000 | 1929802  | 0     | 0    | 1120  | 1195  | 1563  | 2683  | 4813  |
| 186160  | 208546  | 157292  | 87845   | 29955  | 5303  | 0    | 1170107  | 0     | 0    | 1753  | 2073  | 2883  | 4216  | 9330  |
| 225208  | 268973  | 235438  | 155738  | 60038  | 9343  | 0    | 1408427  | 0     | 0    | 0     | 0     | 0     | 1300  | 3440  |
| 265525  | 271720  | 195821  | 116170  | 35554  | 4480  | 0    | 1631955  | 0     | 0    | 0     | 1425  | 3180  | 3755  | 7053  |
| 159380  | 192584  | 176320  | 113253  | 48575  | 7600  | 1055 | 1082097  | 0     | 0    | 0     | 1655  | 2720  | 3985  | 6960  |
| 149865  | 186927  | 168403  | 123308  | 48820  | 10545 | 0    | 978711   | 0     | 0    | 0     | 1030  | 1260  | 1560  | 3070  |
| 189428  | 204110  | 155468  | 90230   | 28180  | 3675  | 0    | 1184875  | 0     | 0    | 0     | 0     | 0     | 1863  | 3368  |
| 207222  | 215245  | 164755  | 103228  | 34145  | 5855  | 0    | 1225643  | 0     | 0    | 0     | 1015  | 1050  | 2483  | 4365  |
| 211315  | 204798  | 153305  | 86550   | 27890  | 3460  | 0    | 1216103  | 0     | 0    | 0     | 1010  | 1405  | 2135  | 4473  |
| 179552  | 211350  | 166749  | 105637  | 40501  | 6025  | 0    | 1136076  | 0     | 0    | 0     | 0     | 0     | 1228  | 2680  |
| 175522  | 194831  | 160756  | 103875  | 37778  | 6880  | 0    | 1105114  | 0     | 0    | 0     | 0     | 0     | 1655  | 2025  |
| 190680  | 199145  | 155033  | 96645   | 33270  | 5055  | 0    | 1107081  | 0     | 0    | 0     | 0     | 1005  | 2795  | 3140  |
| 143538  | 156463  | 116373  | 71885   | 25280  | 4513  | 0    | 871874   | 0     | 0    | 0     | 0     | 0     | 1570  | 2860  |
| 120148  | 115645  | 76758   | 39785   | 11288  | 1850  | 0    | 732652   | 0     | 0    | 0     | 1288  | 2223  | 3683  | 6168  |
| 134410  | 144438  | 111638  | 64700   | 22623  | 2695  | 0    | 821792   | 0     | 0    | 0     | 0     | 0     | 1433  | 2590  |
| 104215  | 121045  | 105451  | 63170   | 24905  | 4845  | 0    | 655123   | 0     | 0    | 0     | 0     | 1295  | 2218  | 2641  |
| 126288  | 133804  | 103820  | 62118   | 20198  | 4060  | 0    | 759587   | 0     | 0    | 0     | 0     | 0     | 0     | 1960  |
| 119832  | 129960  | 96660   | 56513   | 19435  | 3568  | 0    | 719809   | 0     | 0    | 0     | 0     | 0     | 0     | 2378  |
| 134715  | 131608  | 89963   | 53973   | 18710  | 2265  | 0    | 787610   | 0     | 0    | 0     | 0     | 1310  | 1748  | 3010  |
| 72094   | 55800   | 29120   | 11285   | 2500   | 0     | 0    | 529063   | 0     | 0    | 0     | 1703  | 3020  | 5374  | 11003 |
| 91348   | 101008  | 79068   | 45570   | 15915  | 2360  | 0    | 572156   | 0     | 0    | 0     | 0     | 0     | 1343  | 2838  |

| 35-39 | 40-44  | 45-49  | 50-54  | 55-59  | 60-64  | 65-69   | 70-74   | 75-79   | 80-84   | 85-89   | 90-94   | 95-99  | 100-  |
|-------|--------|--------|--------|--------|--------|---------|---------|---------|---------|---------|---------|--------|-------|
| 75460 | 166750 | 306684 | 466921 | 632149 | 889147 | 1433087 | 2016969 | 2682713 | 2593019 | 2101952 | 1021348 | 221100 | 17185 |
| 30070 | 65014  | 119715 | 181372 | 265233 | 374699 | 634910  | 958494  | 1256105 | 1127541 | 879535  | 417767  | 88665  | 6455  |
| 30465 | 66565  | 117250 | 173918 | 246993 | 350338 | 575185  | 806802  | 1063505 | 975451  | 789590  | 370643  | 75195  | 6470  |
| 9785  | 26435  | 50957  | 99390  | 136241 | 198546 | 288976  | 381756  | 466640  | 368750  | 242911  | 94436   | 14771  | 980   |
| 21691 | 51967  | 93543  | 146616 | 209304 | 290154 | 486808  | 746141  | 1002816 | 935191  | 761216  | 395625  | 102552 | 11560 |
| 24710 | 55330  | 106505 | 165303 | 224303 | 307032 | 496175  | 708758  | 920870  | 850497  | 666205  | 322810  | 78180  | 7732  |
| 18665 | 40585  | 79740  | 128225 | 175841 | 269253 | 458426  | 681787  | 927461  | 883648  | 738323  | 389687  | 99170  | 12271 |
| 28695 | 67575  | 124915 | 188335 | 255085 | 359913 | 557420  | 731600  | 849523  | 690988  | 480891  | 203307  | 39170  | 2175  |
| 5902  | 14035  | 27136  | 49919  | 66257  | 89263  | 141845  | 198335  | 259282  | 219740  | 161433  | 72222   | 12017  | 895   |
| 10503 | 25160  | 41325  | 64203  | 96486  | 153020 | 268325  | 405713  | 526311  | 525746  | 469023  | 266528  | 69920  | 7530  |
| 18178 | 42898  | 80560  | 120643 | 155744 | 207197 | 317564  | 414433  | 501831  | 413608  | 278979  | 110375  | 20800  | 2045  |
| 7578  | 18433  | 35643  | 53645  | 74273  | 106065 | 170030  | 255715  | 341580  | 337705  | 298271  | 162203  | 37580  | 3450  |
| 16663 | 37259  | 69066  | 97505  | 121260 | 158506 | 244880  | 347343  | 425135  | 347693  | 232579  | 100670  | 24663  | 2243  |
| 6873  | 15015  | 32458  | 50396  | 72635  | 104265 | 172892  | 264797  | 356701  | 347974  | 288437  | 157267  | 40568  | 4663  |
| 12170 | 26815  | 41918  | 70663  | 95955  | 127753 | 192500  | 247875  | 260218  | 223798  | 158116  | 71915   | 15215  | 1120  |
| 11425 | 24165  | 41509  | 59470  | 81605  | 104140 | 178710  | 264370  | 363427  | 361464  | 289228  | 148057  | 40825  | 5370  |
| 6490  | 12625  | 24385  | 43160  | 61765  | 85790  | 145005  | 220731  | 306960  | 310640  | 273340  | 156125  | 39685  | 4780  |
| 7790  | 18356  | 38370  | 57653  | 75060  | 99583  | 156935  | 207258  | 253492  | 220181  | 154857  | 64413   | 13750  | 0     |
| 8690  | 17795  | 34558  | 51105  | 72795  | 98670  | 154550  | 199885  | 221030  | 195990  | 145698  | 77123   | 15810  | 1220  |
| 7725  | 17645  | 30155  | 49064  | 73975  | 106398 | 166615  | 199063  | 214529  | 188408  | 128165  | 54505   | 13275  | 1045  |
| 5388  | 12380  | 25730  | 40150  | 52105  | 77548  | 130018  | 186550  | 250082  | 231688  | 178486  | 90248   | 20835  | 1645  |
| 4650  | 10980  | 24663  | 38962  | 53544  | 75847  | 120325  | 168381  | 217909  | 213177  | 173882  | 91221   | 20719  | 2028  |
| 6185  | 14415  | 25870  | 44445  | 63660  | 87335  | 135575  | 181813  | 218277  | 182565  | 141353  | 64030   | 14645  | 1430  |
| 6248  | 14648  | 27595  | 41183  | 54240  | 75286  | 117750  | 162415  | 189429  | 163628  | 132590  | 64365   | 16410  | 2328  |
| 12971 | 27560  | 46213  | 63880  | 78981  | 101893 | 148240  | 191515  | 198465  | 145670  | 89526   | 36395   | 7530   | 0     |
| 5585  | 12125  | 23665  | 35455  | 46298  | 70533  | 107415  | 147598  | 173570  | 152498  | 114644  | 50308   | 12409  | 0     |
| 5725  | 11630  | 18968  | 26715  | 40240  | 57258  | 92028   | 144563  | 186385  | 168734  | 132654  | 69053   | 18805  | 2625  |
| 4405  | 10335  | 20115  | 31925  | 43525  | 58920  | 94545   | 119505  | 144493  | 127803  | 102690  | 50314   | 11428  | 1138  |
| 4393  | 10608  | 21133  | 29688  | 43825  | 61193  | 95421   | 128373  | 143015  | 131026  | 95880   | 49043   | 12723  | 1348  |
| 5235  | 10506  | 22313  | 33300  | 48060  | 61625  | 95015   | 120075  | 132845  | 104453  | 76473   | 32880   | 6060   | 0     |
| 23526 | 46873  | 78447  | 99636  | 108720 | 114966 | 138150  | 135652  | 113625  | 59562   | 23873   | 6623    | 1030   | 0     |
| 5885  | 12010  | 23500  | 35938  | 51370  | 66375  | 103558  | 136038  | 165770  | 140058  | 102406  | 47605   | 11225  | 1265  |

| Total    | Man+Woman |       |        |        |        |        |        |         |         |         |           |           |           |
|----------|-----------|-------|--------|--------|--------|--------|--------|---------|---------|---------|-----------|-----------|-----------|
|          | 0-4       | 5-9   | 10-14  | 15-19  | 20-24  | 25-29  | 30-34  | 35-39   | 40-44   | 45-49   | 50-54     | 55-59     | 60-64     |
| 14712689 | -         | 5,850 | 11,545 | 18,215 | 28,265 | 45,545 | 86,980 | 171,710 | 365,725 | 675,368 | 1,017,528 | 1,413,309 | 1,939,325 |
| 6458641  | 3,165     | 6,680 | 10,833 | 14,165 | 16,470 | 24,425 | 42,358 | 73,220  | 147,359 | 268,085 | 393,161   | 565,368   | 773,848   |
| 5692999  | 3,240     | 7,595 | 8,125  | 10,698 | 16,000 | 22,445 | 40,534 | 79,765  | 159,370 | 279,925 | 415,413   | 585,624   | 795,718   |
| 2395606  | -         | 839   | 1,212  | 2,868  | 2,885  | 7,869  | 12,106 | 21,258  | 47,048  | 94,274  | 156,712   | 223,264   | 313,960   |
| 5282603  | -         | 4,671 | 6,441  | 6,773  | 7,590  | 12,045 | 24,526 | 49,966  | 109,385 | 193,433 | 295,571   | 418,312   | 565,199   |
| 4954801  | -         | -     | 1,613  | 4,533  | 6,552  | 11,837 | 24,958 | 55,513  | 124,965 | 224,519 | 335,366   | 462,601   | 615,085   |
| 4930097  | 2,400     | 6,785 | 7,845  | 6,505  | 7,155  | 11,875 | 19,655 | 40,260  | 83,770  | 164,913 | 253,725   | 353,014   | 514,143   |
| 4615982  | 1,140     | 3,385 | 5,330  | 7,595  | 10,520 | 16,455 | 33,640 | 65,755  | 143,165 | 258,270 | 385,233   | 525,110   | 723,743   |
| 1323070  | -         | -     | 420    | 1,139  | 1,112  | 2,420  | 5,061  | 11,250  | 24,536  | 44,164  | 72,980    | 102,337   | 138,551   |
| 2945183  | 1,415     | 2,070 | 4,505  | 4,300  | 4,430  | 7,385  | 13,085 | 24,138  | 49,695  | 89,925  | 137,198   | 201,161   | 307,765   |
| 2701386  | -         | -     | -      | 2,608  | 4,415  | 9,858  | 20,093 | 39,846  | 92,028  | 164,618 | 239,811   | 318,317   | 408,423   |
| 1913545  | -         | -     | 1,120  | 2,488  | 4,078  | 6,110  | 11,533 | 20,091  | 42,543  | 84,201  | 126,903   | 179,141   | 248,695   |
| 2245720  | -         | -     | 3,163  | 4,021  | 5,423  | 7,749  | 16,035 | 29,268  | 64,603  | 117,080 | 161,475   | 205,229   | 260,191   |
| 1919681  | -         | -     | -      | -      | 1,120  | 3,488  | 7,173  | 15,781  | 34,933  | 67,938  | 102,354   | 146,533   | 204,436   |
| 1561444  | -         | -     | -      | 3,200  | 6,475  | 8,970  | 16,746 | 30,295  | 63,158  | 104,338 | 158,881   | 220,033   | 294,208   |
| 1989085  | -         | -     | 1,335  | 3,845  | 6,510  | 8,515  | 14,870 | 22,530  | 44,920  | 74,644  | 104,363   | 140,447   | 178,330   |
| 1698401  | -         | -     | -      | 1,030  | 1,260  | 3,090  | 6,060  | 11,065  | 23,275  | 42,515  | 76,080    | 109,065   | 151,917   |
| 1372929  | -         | -     | -      | -      | 1,038  | 4,146  | 8,341  | 19,058  | 42,546  | 83,682  | 123,503   | 166,015   | 211,223   |
| 1303832  | -         | -     | -      | 2,675  | 2,695  | 5,393  | 9,620  | 18,795  | 37,200  | 71,683  | 108,890   | 150,805   | 211,095   |
| 1259590  | -         | -     | -      | 2,215  | 3,385  | 5,555  | 10,693 | 17,560  | 40,785  | 72,165  | 107,127   | 156,531   | 225,856   |
| 1306761  | -         | -     | -      | -      | 1,090  | 3,323  | 6,810  | 14,538  | 29,365  | 61,785  | 91,328    | 125,310   | 170,948   |
| 1219968  | -         | -     | -      | -      | 1,275  | 3,425  | 5,703  | 12,560  | 28,590  | 58,921  | 90,752    | 130,446   | 169,744   |
| 1188538  | -         | -     | 1,120  | -      | 2,255  | 4,790  | 7,285  | 13,395  | 29,280  | 53,820  | 91,873    | 136,080   | 186,135   |
| 1072545  | -         | -     | -      | -      | 1,250  | 3,805  | 7,523  | 15,426  | 32,913  | 57,760  | 84,218    | 110,603   | 152,761   |
| 1162201  | -         | -     | -      | 1,288  | 4,009  | 6,691  | 11,953 | 24,489  | 49,758  | 82,161  | 110,578   | 140,147   | 179,531   |
| 956126   | -         | -     | -      | -      | -      | 3,116  | 6,255  | 13,058  | 29,010  | 51,203  | 76,940    | 104,159   | 146,688   |
| 981537   | -         | -     | 1,213  | 1,210  | 1,295  | 4,123  | 5,551  | 11,315  | 22,663  | 37,981  | 52,293    | 75,410    | 107,068   |
| 823101   | -         | -     | -      | -      | -      | 1,470  | 5,238  | 10,858  | 24,930  | 44,680  | 70,118    | 96,435    | 128,860   |
| 830047   | -         | -     | -      | -      | -      | 1,400  | 5,118  | 10,331  | 24,491  | 46,412  | 63,723    | 93,008    | 125,248   |
| 754908   | -         | -     | -      | -      | 2,990  | 4,028  | 7,890  | 12,755  | 26,886  | 49,203  | 77,108    | 107,200   | 140,113   |
| 971783   | -         | -     | -      | 3,131  | 5,170  | 9,877  | 19,201 | 39,034  | 77,582  | 123,412 | 153,545   | 170,062   | 179,334   |
| 907184   | -         | -     | -      | -      | -      | 2,981  | 5,896  | 11,708  | 24,731  | 43,915  | 63,969    | 89,200    | 118,616   |

| 65-69     | 70-74     | 75-79     | 80-84     | 85-89     | 90-94     | 95-99   | 100-   | Total      |
|-----------|-----------|-----------|-----------|-----------|-----------|---------|--------|------------|
| 3,009,132 | 4,060,407 | 5,144,350 | 4,631,925 | 3,424,539 | 1,509,156 | 292,407 | 20,560 | 27,871,841 |
| 1,264,448 | 1,815,858 | 2,282,086 | 1,967,737 | 1,408,489 | 612,915   | 115,541 | 7,980  | 11,814,191 |
| 1,251,434 | 1,670,308 | 2,095,228 | 1,824,983 | 1,328,448 | 567,498   | 103,245 | 8,190  | 11,273,786 |
| 472,171   | 579,588   | 711,538   | 570,590   | 349,582   | 128,712   | 18,328  | 980    | 3,715,783  |
| 906,321   | 1,333,851 | 1,726,788 | 1,543,468 | 1,153,838 | 545,106   | 129,352 | 13,265 | 9,045,901  |
| 954,665   | 1,320,720 | 1,638,270 | 1,433,267 | 1,023,052 | 454,370   | 98,447  | 9,587  | 8,799,920  |
| 862,610   | 1,268,265 | 1,654,989 | 1,520,475 | 1,172,122 | 556,182   | 130,360 | 14,426 | 8,651,474  |
| 1,098,327 | 1,381,790 | 1,552,449 | 1,209,625 | 777,241   | 303,262   | 53,080  | 2,175  | 8,557,290  |
| 219,714   | 293,203   | 383,557   | 321,013   | 224,988   | 95,694    | 15,327  | 1,254  | 1,958,717  |
| 524,888   | 756,881   | 968,931   | 922,186   | 740,798   | 375,863   | 90,140  | 8,935  | 5,235,694  |
| 601,804   | 746,156   | 856,861   | 678,371   | 425,889   | 156,359   | 26,320  | 2,045  | 4,793,822  |
| 389,373   | 552,713   | 710,190   | 649,761   | 510,106   | 247,801   | 52,050  | 4,450  | 3,843,347  |
| 386,163   | 533,503   | 633,681   | 504,985   | 320,424   | 130,625   | 29,966  | 2,243  | 3,415,827  |
| 329,207   | 490,005   | 625,674   | 583,412   | 444,175   | 217,305   | 49,911  | 4,663  | 3,328,108  |
| 419,568   | 513,400   | 531,938   | 419,619   | 274,286   | 107,469   | 19,695  | 1,120  | 3,193,399  |
| 299,365   | 423,750   | 556,011   | 537,784   | 402,481   | 196,632   | 48,425  | 6,425  | 3,071,182  |
| 251,626   | 370,596   | 493,887   | 479,043   | 396,648   | 204,945   | 50,230  | 4,780  | 2,677,112  |
| 313,210   | 396,686   | 457,602   | 375,649   | 245,087   | 92,593    | 17,425  | -      | 2,557,804  |
| 323,418   | 407,107   | 436,275   | 360,745   | 248,926   | 111,268   | 21,665  | 1,220  | 2,529,475  |
| 347,513   | 410,378   | 419,327   | 341,713   | 214,715   | 82,395    | 16,735  | 1,045  | 2,475,693  |
| 268,992   | 366,102   | 461,432   | 398,437   | 284,123   | 130,749   | 26,860  | 1,645  | 2,442,837  |
| 256,707   | 343,903   | 412,740   | 373,933   | 277,757   | 128,999   | 27,599  | 2,028  | 2,325,082  |
| 285,645   | 372,493   | 417,422   | 337,598   | 237,998   | 97,300    | 19,700  | 1,430  | 2,295,619  |
| 228,943   | 305,953   | 345,892   | 280,001   | 204,475   | 89,645    | 20,923  | 2,328  | 194,419    |
| 249,673   | 311,663   | 314,110   | 222,428   | 129,311   | 47,683    | 9,380   | -      | 1,894,853  |
| 215,958   | 282,008   | 318,008   | 264,136   | 179,344   | 72,931    | 15,104  | -      | 1,777,918  |
| 170,088   | 248,778   | 307,430   | 274,185   | 195,824   | 93,958    | 23,650  | 2,625  | 1,636,660  |
| 192,440   | 245,793   | 278,297   | 231,623   | 164,808   | 70,512    | 15,488  | 1,138  | 1,582,688  |
| 192,749   | 248,205   | 272,975   | 227,686   | 152,393   | 68,478    | 16,291  | 1,348  | 1,549,856  |
| 210,325   | 254,790   | 264,453   | 194,416   | 130,446   | 51,590    | 8,325   | -      | 1,542,518  |
| 209,334   | 207,746   | 169,425   | 88,682    | 35,158    | 9,123     | 1,030   | -      | 1,500,846  |
| 178,688   | 227,386   | 266,778   | 219,126   | 147,976   | 63,520    | 13,585  | 1,265  | 1,479,340  |
