# Supplementary material for: Nation-Wide Analysis of Glaucoma Medication Prescription in Fiscal Year of 2019 in Japan
Source: MDPI journal article supplement (doi:10.3390/jpm12060956), 2022-06-11
Supplement: s1 [file s1]

| Age   | Single     | FDC       | Brand      | Generic   | Man        | Woman      | Total      | PG        | β+CAI     |
|-------|------------|-----------|------------|-----------|------------|------------|------------|-----------|-----------|
| 0~4   | 7,055      | 4,305     | 11,360     | -         | 7,900      | 3,460      | 11,360     | -         | 4,305     |
| 5~9   | 26,971     | 10,904    | 37,875     | -         | 21,908     | 15,967     | 37,875     | 4,671     | 10,904    |
| 10~14 | 48,445     | 17,375    | 64,700     | 1,120     | 37,027     | 28,793     | 65,820     | 9,594     | 17,375    |
| 15~19 | 71,851     | 32,651    | 95,124     | 9,378     | 53,629     | 50,873     | 104,502    | 14,933    | 30,043    |
| 20~24 | 106,169    | 50,543    | 133,653    | 23,059    | 86,801     | 69,911     | 156,712    | 21,702    | 42,725    |
| 25~29 | 186,150    | 88,054    | 226,004    | 48,199    | 152,449    | 121,755    | 274,203    | 48,672    | 67,302    |
| 30~34 | 354,110    | 164,380   | 424,273    | 94,217    | 285,018    | 233,471    | 518,490    | 103,281   | 123,433   |
| 35~39 | 699,746    | 306,845   | 827,921    | 178,670   | 556,867    | 449,724    | 1,006,591  | 213,982   | 220,843   |
| 40~44 | 1,480,278  | 660,930   | 1,758,066  | 383,142   | 1,136,716  | 1,004,492  | 2,141,208  | 472,437   | 468,401   |
| 45~49 | 2,671,652  | 1,215,341 | 3,209,652  | 677,340   | 2,032,389  | 1,854,603  | 3,886,992  | 858,225   | 846,335   |
| 50~54 | 3,975,103  | 1,823,616 | 4,785,294  | 1,013,425 | 2,959,936  | 2,838,783  | 5,798,719  | 1,292,142 | 1,278,222 |
| 55~59 | 5,482,682  | 2,537,594 | 6,616,075  | 1,404,201 | 4,142,750  | 3,877,526  | 8,020,276  | 1,802,329 | 1,797,506 |
| 60~64 | 7,454,691  | 3,432,066 | 8,977,645  | 1,909,111 | 5,498,246  | 5,388,511  | 10,886,756 | 2,444,139 | 2,471,728 |
| 65~69 | 11,631,434 | 5,253,065 | 14,039,579 | 2,844,920 | 8,265,620  | 8,618,879  | 16,884,499 | 3,808,058 | 3,812,352 |
| 70~74 | 15,931,334 | 6,808,651 | 19,160,809 | 3,579,176 | 10,659,682 | 12,080,303 | 22,739,985 | 5,299,837 | 4,955,804 |
| 75~79 | 19,758,168 | 7,950,426 | 23,843,119 | 3,865,475 | 12,374,600 | 15,333,994 | 27,708,594 | 6,566,429 | 5,761,791 |
| 80~84 | 17,458,512 | 6,530,090 | 20,889,512 | 3,099,091 | 10,049,709 | 13,938,894 | 23,988,603 | 5,753,493 | 4,703,700 |
| 85~89 | 12,837,832 | 4,387,615 | 15,140,769 | 2,084,678 | 6,322,241  | 10,903,206 | 17,225,447 | 4,205,155 | 3,154,759 |
| 90~94 | 5,825,595  | 1,795,043 | 6,757,846  | 862,791   | 2,311,526  | 5,309,112  | 7,620,637  | 1,925,362 | 1,286,343 |
| 95~99 | 1,246,676  | 329,908   | 1,399,693  | 176,891   | 359,853    | 1,216,731  | 1,576,584  | 426,478   | 231,704   |
| 100~  | 110,132    | 19,018    | 118,256    | 10,894    | 16,154     | 112,996    | 129,150    | 39,298    | 13,300    |

| $\alpha 2$ | CAI       | PG+ $\beta$ | ROCK      | $\beta$   | EP2     | Other     |
|------------|-----------|-------------|-----------|-----------|---------|-----------|
| -          | 3,815     | -           | 3,240     | -         | -       | -         |
| 5,850      | 8,855     | -           | 7,595     | -         | -       | -         |
| 11,545     | 13,470    | -           | 8,125     | 4,376     | -       | 1,335     |
| 18,215     | 13,480    | 2,608       | 10,698    | 6,519     | 3,131   | 4,875     |
| 28,265     | 16,535    | 7,818       | 16,000    | 10,727    | 5,170   | 7,770     |
| 45,545     | 29,443    | 20,752      | 22,445    | 18,563    | 9,877   | 11,605    |
| 86,980     | 49,645    | 40,947      | 40,534    | 33,539    | 19,201  | 20,930    |
| 171,710    | 96,588    | 86,002      | 79,765    | 65,072    | 39,034  | 33,595    |
| 365,725    | 199,945   | 192,529     | 159,370   | 137,024   | 77,582  | 68,195    |
| 675,368    | 380,341   | 369,006     | 279,925   | 237,222   | 123,412 | 117,159   |
| 1,017,528  | 591,686   | 545,394     | 415,413   | 324,346   | 153,545 | 180,443   |
| 1,413,309  | 841,060   | 740,088     | 585,624   | 420,786   | 170,062 | 249,512   |
| 1,939,325  | 1,219,138 | 960,338     | 795,718   | 546,790   | 179,334 | 330,247   |
| 3,009,132  | 1,996,561 | 1,440,713   | 1,251,434 | 805,924   | 209,334 | 550,991   |
| 4,060,407  | 2,804,746 | 1,852,847   | 1,670,308 | 1,093,944 | 207,746 | 794,346   |
| 5,144,350  | 3,477,617 | 2,188,635   | 2,095,228 | 1,255,221 | 169,425 | 1,049,898 |
| 4,631,925  | 3,141,004 | 1,826,390   | 1,824,983 | 1,001,598 | 88,682  | 1,016,827 |
| 3,424,539  | 2,399,844 | 1,232,856   | 1,328,448 | 645,559   | 35,158  | 799,129   |
| 1,509,156  | 1,140,613 | 508,700     | 567,498   | 272,266   | 9,123   | 401,577   |
| 292,407    | 261,865   | 98,204      | 103,245   | 62,996    | 1,030   | 98,655    |
| 20,560     | 26,011    | 5,718       | 8,190     | 4,868     | -       | 11,205    |
